# Supplementary material for: Whole-organ analysis of TGF-β-mediated remodelling of the tumour microenvironment by tissue clearing
Source: PubMed Central journal article supplement (PMC7935961; doi:10.1038/s42003-021-01786-y), 2021-03-05
Supplement: 42003_2021_1786_MOESM3_ESM.pdf [file 42003_2021_1786_MOESM3_ESM.pdf]

## Description of Additional Supplementary Files

**File name:** Supplementary Data 1

**Description:** Source data underlying plots shown in Fig. 2, Fig. 3, Fig. 4, Fig. 5, Fig. 6, Fig. 7, Supplementary Fig. 1, and Supplementary Fig. 2.
